# Supplementary material
Source: Hindawi journal article supplement (doi:10.1155/2012/705872)

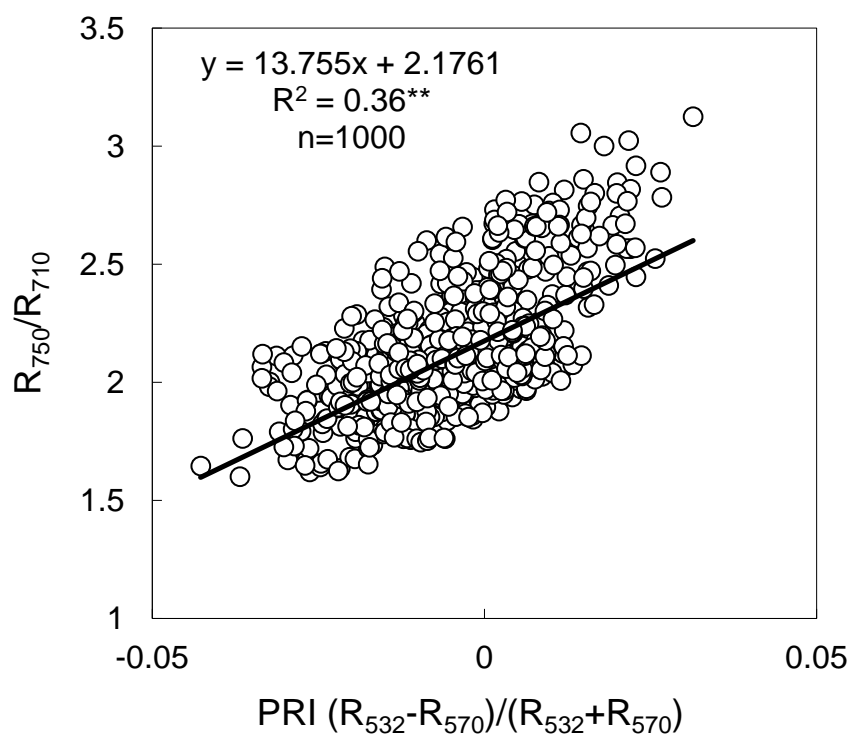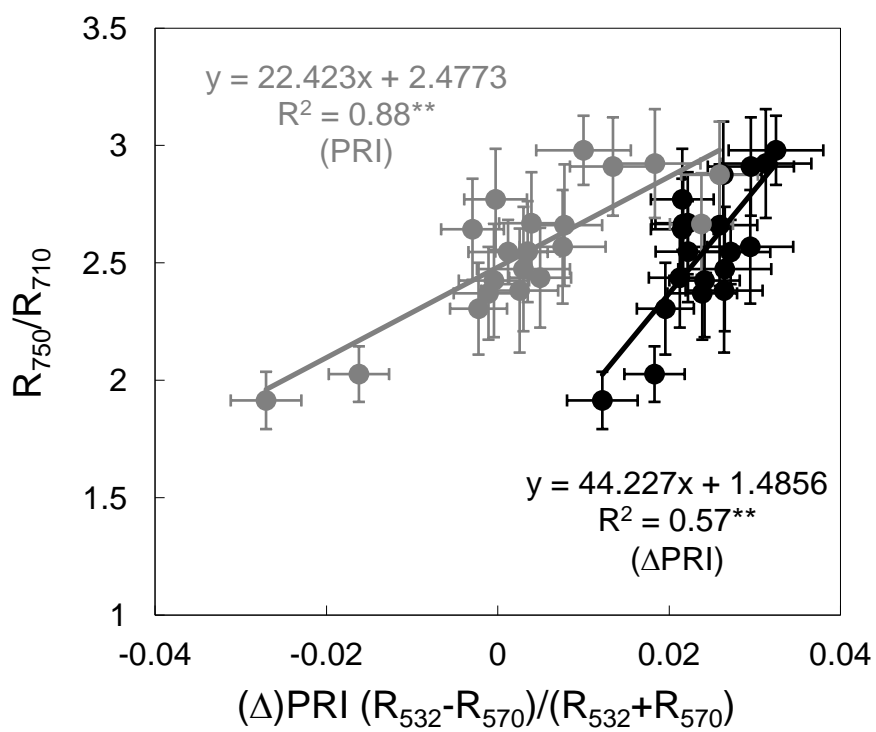

Supplement: f1 [file 705872.f1.pdf]
